# Supplementary material
Source: ML conference proceedings conference paper supplement (https://proceedings.neurips.cc/paper_files/paper/2020/hash/23ad3e314e2a2b43b4c720507cec0723-Abstract.html)
Supplement: Supplementary file [file 23ad3e314e2a2b43b4c720507cec0723-Supplemental.pdf]

---

# Cross-Scale Internal Graph Neural Network for Image Super-Resolution

## (Supplementary Materials)

---

Shangchen Zhou<sup>1</sup> Jiawei Zhang<sup>2</sup> Wangmeng Zuo<sup>3</sup> Chen Change Loy<sup>1\*</sup>

<sup>1</sup>Nanyang Technological University <sup>2</sup>SenseTime Research <sup>3</sup>Harbin Institute of Technology  
{s200094, cloy}@ntu.edu.sg zhangjiawei@sensetime.com wmzuo@hit.edu.cn  
<https://github.com/sczhou/IGNN>

In this supplementary material, we provide additional details and results to the paper. In Sec. A, we first present the detailed architectures of two small sub-networks in the proposed Graph Aggregation module (GraphAgg). Then, we give an illustration of operation details in the GraphAgg. Sec. B presents further analysis and discussions on our proposed GraphAgg module and IGNN network. Finally, we show more visual experimental results compared with other state-of-the-art SR networks in Sec. C.

## A Details in GraphAgg

### A.1 Architecture Details

As presented in Sec. 2.2 in the manuscript, the proposed GraphAgg has two small sub-networks: Edge-Conditioned sub-network (ECN) and Downsampled-Embedding sub-network (DEN). Tables 1 and 2 list the detailed configurations of ECN and DEN, respectively. In Graph Construction, we use the first three layers of the VGG19 [5] with fixed pre-trained parameters.

**Table 1:** Architecture of the Edge-Conditioned sub-network (ECN).

| Layer                                     | Kernel       | Stride | Padding | Feature |
|-------------------------------------------|--------------|--------|---------|---------|
| Input ( $\mathcal{D}^{r \rightarrow q}$ ) |              |        |         | 64      |
| Conv/ReLU                                 | $1 \times 1$ | 1      | 1       | 64      |
| Conv/ReLU                                 | $1 \times 1$ | 1      | 1       | 64      |
| Conv                                      | $1 \times 1$ | 1      | 1       | 1       |

**Table 2:** Architecture of the Downsampled-Embedding sub-network (DEN).

| Layer                        | Kernel       | Stride | Padding | Feature |
|------------------------------|--------------|--------|---------|---------|
| Input ( $F_{L \uparrow s}$ ) |              |        |         | 256     |
| Conv/ReLU                    | $5 \times 5$ | 1      | 1       | 256     |
| Conv/ReLU                    | $3 \times 3$ | 1      | 1       | 256     |
| Conv                         | $3 \times 3$ | 1      | 1       | 256     |

### A.2 Illustration of Detailed Processes in GraphAgg

To further clarify the operations in the GraphAgg, we illustrate the details as shown in Figure 1.

In Figure 1(a), we extract  $l \times l$  LR patches using *img2patch* operation with a stride of  $g$  from features  $E_{L \downarrow s}$  and  $E_L$ , where we set  $l = 3$  and  $g = 2$  in our network. Thus we obtain  $m_1 \times n_1$  LR patches (denoted as  $\mathcal{V}_1^l$ ) and  $m_2 \times n_2$  LR patches (denoted as  $\mathcal{V}_2^l$ ) from  $E_{L \downarrow s}$  and  $E_L$  respectively. Denote the feature shapes of  $E_{L \downarrow s}$  and  $E_L$  as  $H/s \times W/s$  and  $H \times W$  respectively. Therefore,  $m_1 = \lfloor (H/s - l)/g \rfloor + 1$ ,  $n_1 = \lfloor (W/s - l)/g \rfloor + 1$ , and  $m_2 = \lfloor (H - l)/g \rfloor + 1$ ,  $n_2 = \lfloor (W - l)/g \rfloor + 1$ . Each LR patch in  $\mathcal{V}_2^l$  find the  $k$  nearest neighboring LR patches from  $\mathcal{V}_1^l$  according to the Euclidean distance. Note that we do not consider the searching window in this discussion for simplicity.

To obtain  $k$  corresponding HR ( $ls \times ls$ ) patch regions in  $E_L$  scale, we map each LR patch in  $E_{L \downarrow s}$  to HR regions in  $E_L$  scale, as shown in Figure 1(b). In  $E_L$  scale, the  $ls \times ls$  patch regions are obtained

---

\*Corresponding Author.

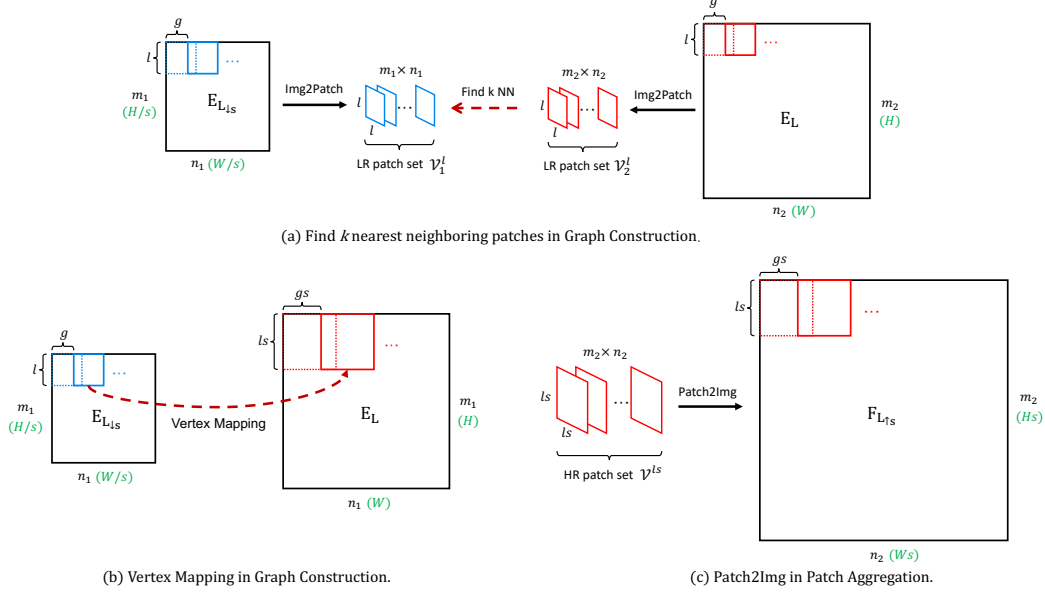

**Figure 1:** In (a),  $n_1 \times m_1$  LR patches and  $n_2 \times m_2$  LR patches are extracted using *img2patch* operation with a stride of  $g$  from features  $E_{L\downarrow s}$  and  $E_L$ , respectively. Each LR patch of  $E_L$  find the  $k$  nearest neighboring LR patches from  $E_{L\downarrow s}$ . In (b), each found LR patch in  $E_{L\downarrow s}$  is mapped to a HR region in  $E_L$  scale. In  $E_L$  scale, the HR patch regions are extracted using *img2patch* operation with the stride of  $gs$ . In (c), we transform  $n_2 \times m_2$  HR patches to the final HR feature  $F_{L\uparrow s}$  using a *patch2img* operation with the stride of  $gs$ . Note that the sizes of LR and HR patches are  $l \times l$  and  $ls \times ls$ , respectively, where  $s$  is desired upsampling factor. Refer to Sec. A.2 for more details.

using *img2patch* operation with the stride of  $gs$ . It exactly has the same number ( $m_1 \times n_1$ ) of patches as LR patches in  $E_{L\downarrow s}$ , i.e.,  $\lfloor (H - ls)/gs \rfloor + 1 = m_1$ ,  $\lfloor (W - ls)/gs \rfloor + 1 = n_1$ . Therefore, the LR and HR patch regions from  $E_{L\downarrow s}$  and  $E_L$  scales can be matched one-on-one.

As presented in Eq. (2) in the manuscript, we obtain one aggregated HR patch for each LR patch in the LR patch set  $\mathcal{V}_2^l$ , which contains  $m_2 \times n_2$  LR patches. Thus, we obtain a HR patch set  $\mathcal{V}^{rs}$  containing  $m_2 \times n_2$  HR patches with  $ls \times ls$  patch size. Figure 1(c) shows that we take the  $\mathcal{V}^{rs}$  as input and use a *patch2img* operation with the stride of  $gs$  to generate the HR features  $F_{L\uparrow s}$ .

## B More Discussions on GraphAgg and IGNN

In this section, we first present more ablation experiments to demonstrate the effectiveness of the proposed IGNN further, including the effect of using  $F_L^l$  and  $F_{L\uparrow s}$  and number of GraphAgg modules inserted in networks. In addition, we report and compare the runtime of the state-of-the-art networks and the proposed IGNN.

### B.1 Effectiveness of $F_L^l$ and $F_{L\uparrow s}$

To validate the effectiveness of both enriched features  $F_L^l$  and aggregated HR features  $F_{L\uparrow s}$ , we compare our network with three variant networks: replacing the enriched LR features  $F_L^l$  by the original LR features  $F_L$  (w/o  $F_L^l$ ), removing aggregated HR features  $F_{L\uparrow s}$  (w/o  $F_{L\uparrow s}$ ) and without both of them (baseline), i.e., EDSR. According to Table 3, these three variant networks generate worse SR results compared to the completed network.

### B.2 Effectiveness of Multiple GraphAgg Module

To explore whether the number of GraphAgg module affects IGNN performance, we evaluate to insert 1 (after 16th residual block), 2 (after 8th and 24th residual block), and 3 (after 8th, 16th, and 24th residual block) GraphAgg modules in the backbone network, respectively. As shown in Table 4, using more GraphAgg module only leads to slight PSNR/SSIM gains. Thus we only employ one

**Table 3:** Results on Urban100 ( $\times 2$ ) for different variants of networks. The (w/o  $F'_L$ ) represents replacing the enriched LR features  $F'_L$  by the original LR features  $F_L$ , and (w/o  $F_{L\uparrow s}$ ) represents removing the aggregated HR features  $F_{L\uparrow s}$ . Note the EDSR is our baseline which is equivalent to removing both  $F'_L$  and  $F_{L\uparrow s}$ .

|      | baseline (EDSR) | w/o $F'_L$ | w/o $F_{L\uparrow s}$ | IGNN          |
|------|-----------------|------------|-----------------------|---------------|
| PSNR | 32.93           | 33.19      | 33.13                 | <b>33.23</b>  |
| SSIM | 0.9351          | 0.9379     | 0.9374                | <b>0.9383</b> |

GraphAgg module in our IGNN as a trade-off among the computational complexity and performance. Compared with the baseline network (EDSR) without GraphAgg inserted, our proposed IGNN shows a large performance gain.

**Table 4:** Results on Urban100 ( $\times 2$ ) for different numbers of GraphAgg modules are inserted in the networks.

|      | 0 (baseline) | <b>1 (after 16th)</b> | 2 (after 8th and 24th ) | 3 (after 8th, 16th, and 24th ) |
|------|--------------|-----------------------|-------------------------|--------------------------------|
| PSNR | 32.93        | 33.23                 | 33.23                   | 33.25                          |
| SSIM | 0.9351       | 0.9383                | 0.9384                  | 0.9385                         |

### B.3 Relationship between Performance Gain and Self-similarity Level

It is worth to analyze further on performance gains for different self-similarity levels. As shown in Figure 2, our method performs better in regions with self-similarity, especially in regions where texture patterns are extremely small. Besides, the performance can also be well maintained to that of EDSR in regions with few self-similar patches.

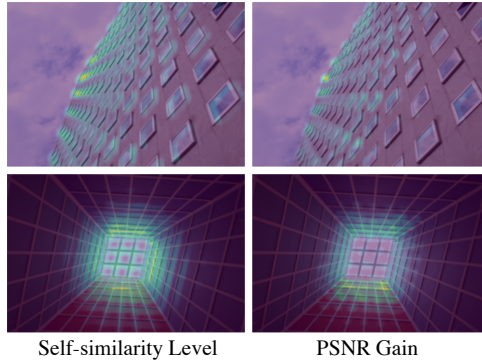

**Figure 2:** Examples to show the relationship between self-similarity level and PSNR gain (over EDSR). The brighter regions indicate larger values.

### B.4 Runtime

Here, we report and compare the runtime of state-of-the-art networks [8, 4, 7, 2, 1] and the proposed IGNN. All existing methods are evaluated using their publicly available code. As shown in Table 5, the proposed network has comparable runtime as [8, 4, 7, 2], but it has better performance on all benchmarks at all scales (Refer to Table 1 in the manuscript). As for SAN [1], the proposed IGNN runs over two times faster than it, and performs better in most cases.

**Table 5:** Runtime of different networks. All methods are evaluated on an NVIDIA Tesla V100 GPU.

|            | RDN [8] | EDSR [4] | RNAN [7] | OISR-RK3 [2] | SAN [1]      | IGNN (Ours)  |
|------------|---------|----------|----------|--------------|--------------|--------------|
| PSNR       | 32.89   | 32.93    | 32.73    | 33.03        | 33.10        | <b>33.23</b> |
| Time (sec) | 1.538   | 1.416    | 2.280    | 1.833        | <u>5.971</u> | 2.676        |

## C Qualitative Comparisons

In this section, we provide more visual comparisons with seven state-of-the-art SISR networks, i.e., VDSR [3], EDSR [4], RDN [8], RCAN [6], OISR [2], SAN [1], and RNAN [7], on standard benchmark datasets. As shown in Figure 3 and Figure 4, the proposed IGNN recovers richer and sharper details from the LR images especially in the regions with recurring patterns.

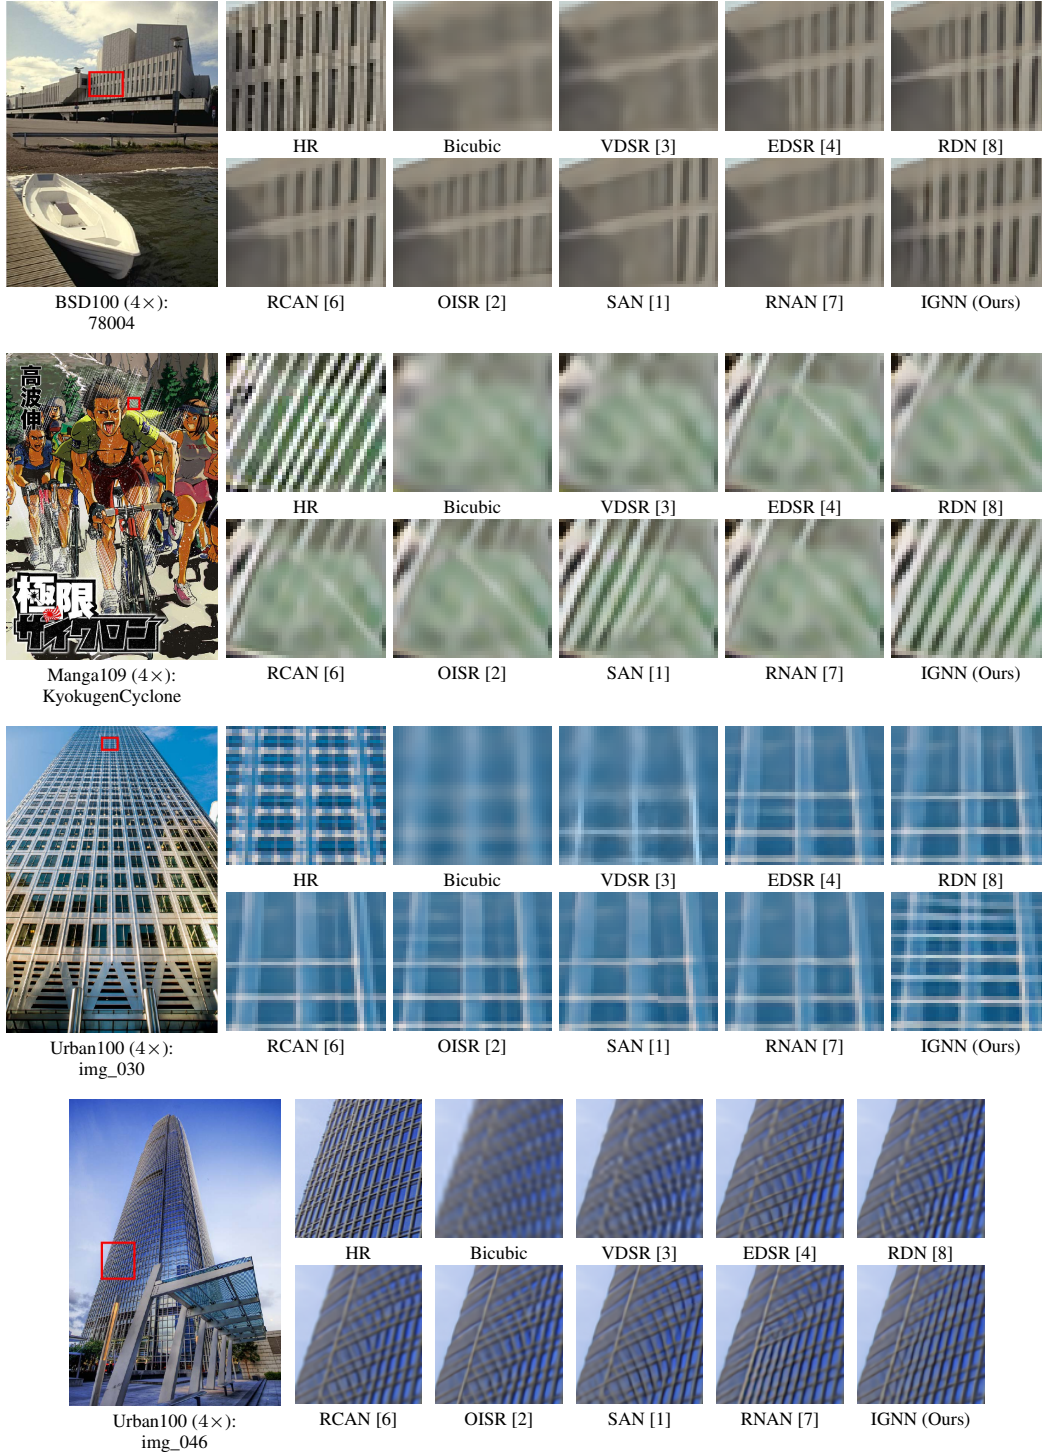

**Figure 3:** Visual comparison for  $\times 4$  SR on benchmark datasets.

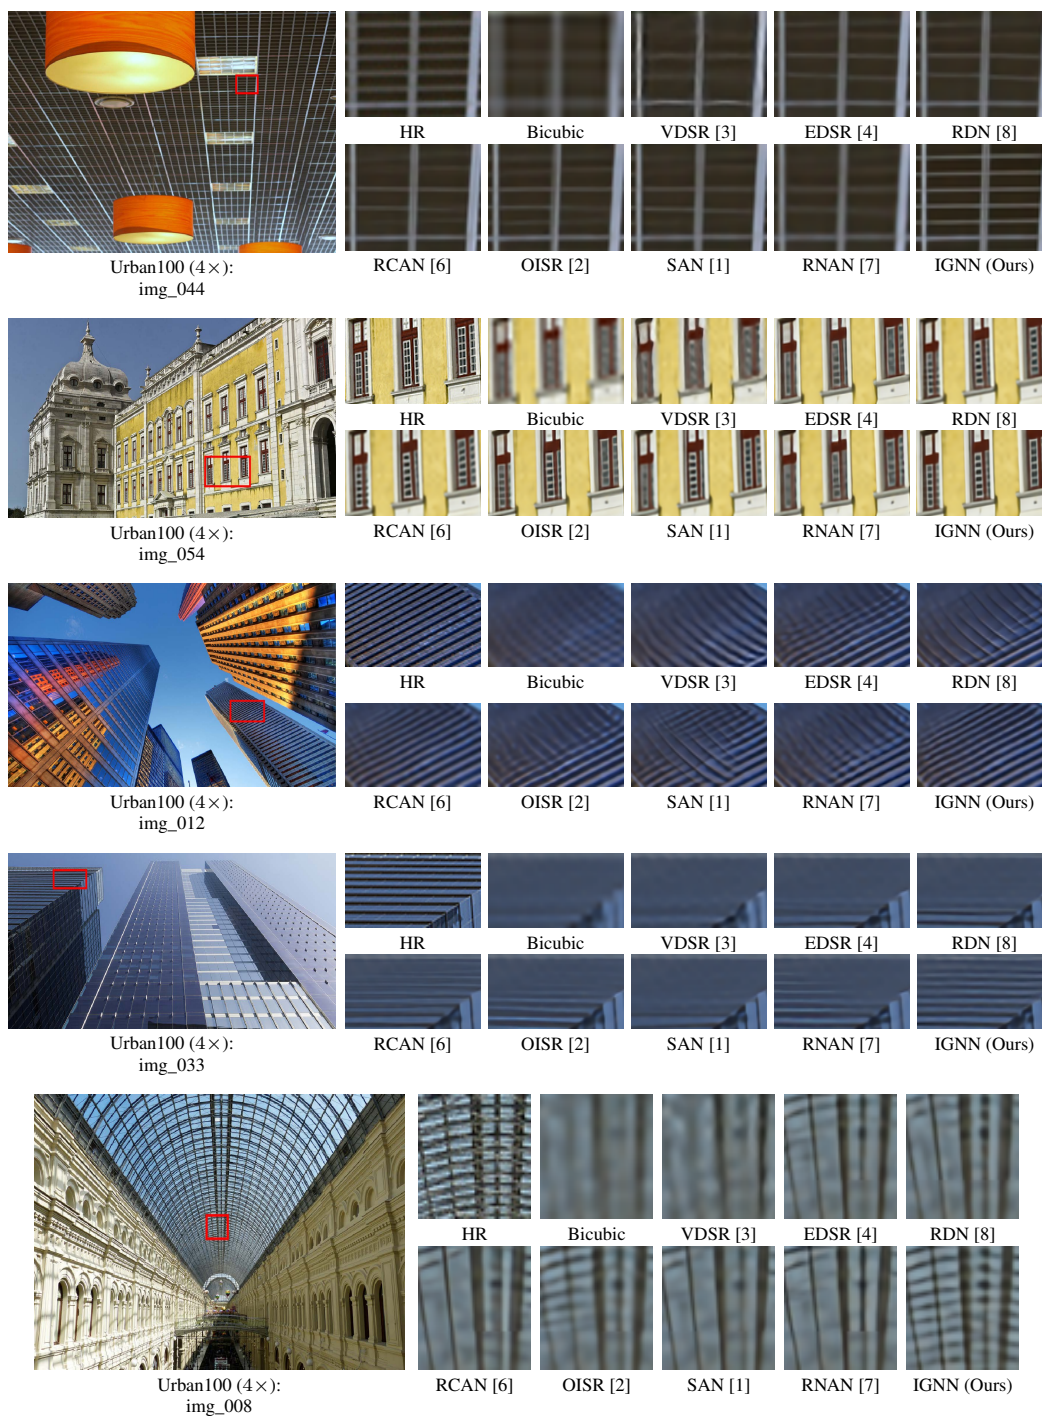

**Figure 4:** Visual comparison for  $\times 4$  SR on benchmark datasets.

## References

- [1] Tao Dai, Jianrui Cai, Yongbing Zhang, Shu-Tao Xia, and Lei Zhang. Second-order attention network for single image super-resolution. In *CVPR*, 2019.
- [2] Xiangyu He, Zitao Mo, Peisong Wang, Yang Liu, Mingyuan Yang, and Jian Cheng. Ode-inspired network design for single image super-resolution. In *CVPR*, 2019.
- [3] Jiwon Kim, Jung Kwon Lee, and Kyoung Mu Lee. Accurate image super-resolution using very deep convolutional networks. In *CVPR*, 2016.
- [4] Bee Lim, Sanghyun Son, Heewon Kim, Seungjun Nah, and Kyoung Mu Lee. Enhanced deep residual networks for single image super-resolution. In *CVPRW*, 2017.
- [5] Karen Simonyan and Andrew Zisserman. Very deep convolutional networks for large-scale image recognition. *arXiv preprint arXiv:1409.1556*, 2014.
- [6] Yulun Zhang, Kunpeng Li, Kai Li, Lichen Wang, Bineng Zhong, and Yun Fu. Image super-resolution using very deep residual channel attention networks. In *ECCV*, 2018.
- [7] Yulun Zhang, Kunpeng Li, Kai Li, Bineng Zhong, and Yun Fu. Residual non-local attention networks for image restoration. In *ICLR*, 2019.
- [8] Yulun Zhang, Yapeng Tian, Yu Kong, Bineng Zhong, and Yun Fu. Residual dense network for image super-resolution. In *CVPR*, 2018.
